# Supplementary material
Source: PubMed Central journal article supplement (PMC5962948)
Supplement: CUAJ-12-E461.pdf [file CUAJ-12-E461.pdf]

## Supplementary data: Validation of the French-Canadian version of the Expanded Prostate Cancer Index Composite (EPIC) in a French-Canadian population

Éric Vigneault, MD<sup>1,2</sup>; Josée Savard, MD<sup>1,3,4</sup>; Marie-Hélène Savard, MD<sup>1,3</sup>; Hans Ivers, MD<sup>1,3,4</sup>; Philippe Després, MD<sup>1,2,3,5</sup>; William Foster, MD<sup>2</sup>; André-Guy Martin, MD<sup>1,2</sup>; Vincent Fradet, MD<sup>1,3,6</sup>

<sup>1</sup>CHU de Québec-Université Laval Research Centre; <sup>2</sup>Department of Radiation Oncology, CHU de Québec-Université Laval; <sup>3</sup>Université Laval Cancer Research Centre; <sup>4</sup>School of Psychology, Université Laval; <sup>5</sup>Département de Physique, de Génie Physique et d'Optique, Université Laval; <sup>6</sup>Department of Surgery, Université Laval; Quebec City, QC, Canada

Published online November 1, 2017

**Supplementary Table 1. Descriptive statistics obtained on the EPIC-50 and results of internal consistency analyses (n=251)**

| Domains                          | n   | Mean score (T1) | SD    | Range      | Cronbach's alpha | Range r(tot) |
|----------------------------------|-----|-----------------|-------|------------|------------------|--------------|
| Urinary                          | 246 | 85.95           | 14.39 | 11.8–100.0 | 0.858            | 0.31–0.81    |
| Bowel                            | 245 | 91.43           | 10.31 | 26.8–100.0 | 0.837            | 0.22–0.72    |
| Sexual                           | 247 | 35.92           | 24.42 | 0.0–92.3   | 0.920            | 0.50–0.81    |
| Hormonal                         | 247 | 90.26           | 12.90 | 17.5–100.0 | 0.805            | 0.33–0.77    |
| Urinary – function               | 251 | 89.94           | 15.48 | 13.3–100.0 | 0.701            | NA           |
| Urinary – bother                 | 246 | 82.99           | 15.92 | 10.7–100.0 | 0.813            | NA           |
| Urinary – incontinence           | 241 | 86.39           | 21.84 | 0–100.0    | 0.889            | NA           |
| Urinary – irritative/obstructive | 246 | 86.73           | 13.37 | 7.1–100.0  | 0.741            | NA           |
| Bowel – function                 | 246 | 90.70           | 10.24 | 28.6–100.0 | 0.567            | NA           |
| Bowel – bother                   | 245 | 92.03           | 12.86 | 21.4–100.0 | 0.858            | NA           |
| Sexual – function                | 244 | 26.80           | 25.71 | 0.0–88.9   | 0.938            | NA           |
| Sexual – bother                  | 243 | 56.51           | 35.72 | 0.0–100.0  | 0.920            | NA           |
| Hormonal – function              | 247 | 89.05           | 15.23 | 20.0–100.0 | 0.589            | NA           |
| Hormonal – bother                | 245 | 91.10           | 12.91 | 15.0–100.0 | 0.705            | NA           |

EPIC: Expanded Prostate Cancer Index Composite; NA: not applicable (item-total correlations reported for the 4 domains); r(tot): item-total correlations.

| <b>Supplementary Table 3. Confirmatory factor structure of the EPIC-50</b> |                  |
|----------------------------------------------------------------------------|------------------|
| <b>Urinary domain</b>                                                      |                  |
| Item #                                                                     | Standard loading |
| 1                                                                          | 0.839            |
| 2                                                                          | 0.263            |
| 3                                                                          | 0.271            |
| 4                                                                          | 0.804            |
| 5                                                                          | 0.733            |
| 6                                                                          | 0.923            |
| 7                                                                          | 0.345            |
| 8                                                                          | 0.282            |
| 9                                                                          | 0.387            |
| 10                                                                         | 0.412            |
| 11                                                                         | 0.526            |
| 12                                                                         | 0.740            |
| <b>Intestinal domain</b>                                                   |                  |
| Item #                                                                     | Standard loading |
| 13                                                                         | 0.391            |
| 14                                                                         | 0.427            |
| 15                                                                         | 0.438            |
| 16                                                                         | 0.404            |
| 17                                                                         | 0.448            |
| 18                                                                         | 0.225            |
| 19                                                                         | 0.427            |
| 20                                                                         | 0.817            |
| 21                                                                         | 0.758            |
| 22                                                                         | 0.682            |
| 23                                                                         | 0.671            |
| 24                                                                         | 0.429            |
| 25                                                                         | 0.606            |
| 26                                                                         | 0.803            |

| <b>Supplementary Table 3 (cont'd). Confirmatory factor structure of the EPIC-50</b> |                  |
|-------------------------------------------------------------------------------------|------------------|
| <b>Sexual domain</b>                                                                |                  |
| Item #                                                                              | Standard loading |
| 27                                                                                  | 0.753            |
| 28                                                                                  | 0.888            |
| 29                                                                                  | 0.865            |
| 30                                                                                  | 0.838            |
| 31                                                                                  | 0.881            |
| 32                                                                                  | 0.608            |
| 33                                                                                  | 0.778            |
| 34                                                                                  | 0.715            |
| 35                                                                                  | 0.855            |
| 36                                                                                  | 0.440            |
| 37                                                                                  | 0.469            |
| 38                                                                                  | 0.494            |
| 39                                                                                  | 0.346            |
| <b>Hormonal domain</b>                                                              |                  |
| Item #                                                                              | Standard loading |
| 40                                                                                  | 0.440            |
| 41                                                                                  | 0.243            |
| 42                                                                                  | 0.626            |
| 43                                                                                  | 0.859            |
| 44                                                                                  | 0.249            |
| 45                                                                                  | 0.516            |
| 46                                                                                  | 0.202            |
| 47                                                                                  | 0.404            |
| 48                                                                                  | 0.704            |
| 49                                                                                  | 0.857            |
| 50                                                                                  | 0.502            |

All loadings were significant at  $p < 0.05$ . EPIC: Expanded Prostate Cancer Index Composite.

| <b>Supplementary Table 3. Results of test-retest and sensitivity to change analyses</b> |                        |                        |                |                      |
|-----------------------------------------------------------------------------------------|------------------------|------------------------|----------------|----------------------|
| <b>Domains</b>                                                                          | <b>Mean score (T1)</b> | <b>Mean score (T2)</b> | <b>F-test</b>  | <b>r (T1 vs. T2)</b> |
| Test-retest analyses (n=68)                                                             |                        |                        |                |                      |
| Urinary                                                                                 | 85.0                   | 85.3                   | 0.13, p=0.72   | 0.90                 |
| Bowel                                                                                   | 91.1                   | 92.3                   | 3.04, p=0.09   | 0.84                 |
| Sexual                                                                                  | 32.5                   | 31.2                   | 0.90, p=0.35   | 0.88                 |
| Hormonal                                                                                | 90.0                   | 90.3                   | 0.05, p=0.82   | 0.79                 |
| Urinary – function                                                                      | 88.4                   | 88.9                   | 0.42, p=0.52   | 0.91                 |
| Urinary – bother                                                                        | 82.5                   | 82.5                   | 0.01, p=0.93   | 0.85                 |
| Urinary – incontinence                                                                  | 84.4                   | 84.6                   | 0.04, p=0.83   | 0.93                 |
| Urinary – irritative/ obstructive                                                       | 86.4                   | 86.5                   | 0.01, p=0.91   | 0.84                 |
| Bowel – function                                                                        | 90.5                   | 92.0                   | 3.20, p=0.08   | 0.70                 |
| Bowel – bother                                                                          | 91.7                   | 92.5                   | 1.12, p=0.29   | 0.90                 |
| Sexual – function                                                                       | 23.3                   | 23.9                   | 0.35, p=0.56   | 0.96                 |
| Sexual – bother                                                                         | 52.9                   | 47.7                   | 2.16, p=0.15   | 0.64                 |
| Hormonal – function                                                                     | 89.0                   | 89.1                   | 0.00, p=0.96   | 0.70                 |
| Hormonal – bother                                                                       | 90.8                   | 91.2                   | 0.11, p=0.74   | 0.73                 |
| Sensitivity to change analyses (n=51)                                                   |                        |                        |                |                      |
| Urinary                                                                                 | 89.5                   | 82.7                   | 13.55, p<0.001 | 0.45                 |
| Bowel                                                                                   | 92.6                   | 86.9                   | 11.93, p=0.001 | 0.42                 |
| Sexual                                                                                  | 49.1                   | 29.1                   | 39.84, p<0.001 | 0.52                 |
| Hormonal                                                                                | 91.1                   | 81.4                   | 26.11, p<0.001 | 0.51                 |
| Urinary – function                                                                      | 95.9                   | 90.1                   | 10.52, p=.002  | 0.29                 |
| Urinary – bother                                                                        | 85.0                   | 77.3                   | 12.50, p<0.001 | 0.52                 |
| Urinary – incontinence                                                                  | 95.1                   | 88.2                   | 6.77, p=0.01   | 0.46                 |
| Urinary – irritative/ obstructive                                                       | 87.8                   | 81.4                   | 11.11, p=0.002 | 0.46                 |
| Bowel – function                                                                        | 91.6                   | 88.0                   | 5.99, p=0.02   | 0.53                 |
| Bowel – bother                                                                          | 93.6                   | 85.8                   | 14.41, p<0.001 | 0.36                 |
| Sexual – function                                                                       | 40.0                   | 22.6                   | 23.33, p<0.001 | 0.51                 |
| Sexual – bother                                                                         | 70.4                   | 44.4                   | 28.81, p<0.001 | 0.37                 |
| Hormonal – function                                                                     | 89.2                   | 77.9                   | 16.78, p<0.001 | 0.35                 |
| Hormonal – bother                                                                       | 92.3                   | 84.5                   | 17.87, p<0.001 | 0.53                 |

**Supplementary Table 4. Correlations between domains of EPIC-50, IPSS, SHIM, and PR25**

| Domain                           | IPSS total<br>(n=206) | IPSS QoL<br>(n=201) | SHIM<br>(n=203) | PR25-SAC <sup>f</sup><br>(n=199) | PR25-SFU <sup>f</sup><br>(n=117) | PR25-URI <sup>s</sup><br>(n=204) | PR25-BOW <sup>s</sup><br>(n=200) | PR25-HTR <sup>s</sup><br>(n=204) | PR25-AID <sup>s</sup><br>(n=40) |
|----------------------------------|-----------------------|---------------------|-----------------|----------------------------------|----------------------------------|----------------------------------|----------------------------------|----------------------------------|---------------------------------|
| Urinary                          | -0.71                 | <b>-0.60</b>        | 0.30            | 0.21                             | 0.34                             | <b>-0.86</b>                     | -0.44                            | -0.34                            | <b>-0.62</b>                    |
| Bowel                            | -0.56                 | -0.39               | 0.17            | 0.11 NS                          | 0.28                             | -0.53                            | <b>-0.70</b>                     | -0.45                            | -0.34                           |
| Sexual                           | -0.21                 | -0.33               | <b>0.79</b>     | <b>0.62</b>                      | 0.73                             | -0.32                            | -0.25                            | -0.35                            | -0.15 NS                        |
| Hormonal                         | -0.45                 | -0.34               | 0.27            | 0.22                             | 0.32                             | -0.43                            | -0.52                            | <b>-0.61</b>                     | -0.31                           |
| Urinary – function               | <b>-0.47</b>          | <b>-0.43</b>        | 0.28            | 0.16                             | 0.23                             | <b>-0.69</b>                     | -0.39                            | -0.30                            | -0.61                           |
| Urinary – bother                 | <b>-0.78</b>          | <b>-0.65</b>        | 0.28            | 0.22                             | 0.33                             | <b>-0.86</b>                     | -0.41                            | -0.33                            | -0.51                           |
| Urinary – incontinence           | <b>-0.44</b>          | <b>-0.39</b>        | 0.27            | 0.16                             | 0.27                             | <b>-0.65</b>                     | -0.34                            | -0.28                            | <b>-0.70</b>                    |
| Urinary – irritative/obstructive | <b>-0.73</b>          | <b>-0.59</b>        | 0.23            | 0.19                             | 0.27                             | <b>-0.77</b>                     | -0.42                            | -0.29                            | -0.27 NS                        |
| Bowel – function                 | -0.48                 | -0.36               | 0.13 NS         | 0.05 NS                          | 0.22                             | -0.47                            | <b>-0.61</b>                     | -0.45                            | -0.35                           |
| Bowel – bother                   | -0.53                 | -0.36               | 0.18            | 0.14                             | 0.27                             | -0.49                            | <b>-0.65</b>                     | -0.38                            | -0.31                           |
| Sexual – function                | -0.19                 | -0.29               | <b>0.86</b>     | <b>0.72</b>                      | <b>0.67</b>                      | -0.30                            | -0.20                            | -0.31                            | -0.06 NS                        |
| Sexual – bother                  | -0.20                 | -0.28               | <b>0.37</b>     | <b>0.19</b>                      | <b>0.68</b>                      | -0.25                            | -0.26                            | -0.28                            | -0.22 NS                        |
| Hormonal – function              | -0.41                 | -0.34               | 0.29            | 0.27                             | 0.27                             | -0.38                            | -0.45                            | -0.53                            | -0.29 NS                        |
| Hormonal – bother                | -0.46                 | -0.32               | 0.22            | 0.17                             | 0.33                             | -0.44                            | -0.55                            | <b>-0.62</b>                     | -0.36                           |

Correlations used for convergent validity are in bold. All correlations are significant at  $p < 0.05$  unless otherwise specified. AIDs: incontinence aid (symptom scale); BOWs: bowel (symptom scale); EPIC = Expanded Prostate Cancer Index Composite; HTRs: hormonal treatment-related (symptom scale); IPSS: International Prostate Symptom Score; PR25: Prostate cancer-specific module of the European Organization for Research and Treatment of Cancer Quality of Life Questionnaire; SACf: sexual activity (functioning scale); SFUf: sexual functioning (functioning scale); SHIM: Sexual Health Inventory for Men; URIs: urinary (symptom scale).
